# Supplementary material for: Energy efficient synthesis of highly ordered mesoporous carbon nitrides with uniform rods and their superior CO2adsorption capacity
Source: Royal Society of Chemistry journal article supplement (doi:10.1039/c6ta10716h), 2017-01-01
Supplement: c6ta10716h1.pdf [file c6ta10716h1.pdf]

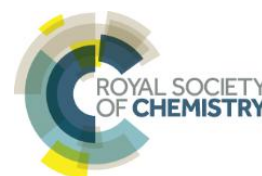

**Journal of Materials Chemistry A**

## **Supporting Information**

### **Energy efficient synthesis of highly ordered mesoporous carbon nitrides with uniform rods and their superior CO<sub>2</sub> adsorption capacity**

Kripal S. Lakhi<sup>a</sup>, Dae-Hwan Park<sup>a\*</sup>, Gurwinder Singh<sup>a</sup>, Siddulu N. Talapaneni<sup>a</sup>, Ugo Ravon<sup>b</sup>,  
Khalid Al-Bahily<sup>b</sup>, and Ajayan Vinu<sup>a\*</sup>

<sup>a</sup>*Future Industries Institute, Division of Information Technology, Engineering and Environment, Mawson Lakes Campus, University of South Australia, Adelaide 5095, Australia*

<sup>b</sup>*SABIC Corporate Research and Development Center at KAUST, Saudi Basic Industries Corporation, Thuwal 23955, Saudi Arabia*

*\*To whom the correspondence should be addressed*

*Email: [Ajayan.Vinu@unisa.edu.au](mailto:Ajayan.Vinu@unisa.edu.au); [Daehwan.Park@unisa.edu.au](mailto:Daehwan.Park@unisa.edu.au)*

*Ph: +61-8-830-25384, Fax: +61-8-830-25639*

## 1. Experiment-Synthesis of silica template SEW-SBA-15-T and SEW-MCN-1-T

In a typical synthesis, 4 g of non-ionic surfactant Pluronic P-123 which is a triblock copolymer ( $\text{EO}_{20} \text{PO}_{70} \text{EO}_{20}$ ), Avg. mwt  $\sim 5800$ , Sigma-Aldrich) was added to 30 g of water in a polypropylene (PP) bottle with a cap and the solution was stirred for 4 hr at room temperature followed by the addition of 120 g of 2 M HCl. Simultaneously, the temperature was raised to 40 °C and the mixture was stirred for 2 hr. After this, 9 g of tetraethyl orthosilicate (TEOS, 98% Sigma-Aldrich) was added and the mixture was stirred for just 20 minutes after which stirring was stopped completely and the sample was left unagitated for the next 24 hr with the temperature in the water bath maintained at 40 °C. The solution mixture is now transferred to a Teflon lined autoclave and kept in an oven at 100 °C for 48 hr. The product is filtered in hot and washed three times with water. The filtered product was dried in an oven at 100 °C for 6-8 hr and then washed twice with ethanol, each time stirred with ethanol for 3 hr at room temperature. Finally filtered sample is dried again in an oven overnight before use. SEW-SBA-15-130 and SEW-SBA-15-150 silica templates were prepared following the above procedure except that autoclaving was done at 130 and 150 °C respectively. These samples were labelled as SEW-SBA-15-T (where T = 100, 130 and 150 °C and denotes the hydrothermal temperature).

Mesoporous carbon nitride was prepared using a hard templating approach involving a polymerization reaction between the carbon source CTC ( $\text{CCl}_4$ ) and nitrogen source ethylenediamine inside the mesopores of the ethanol washed silica template material. In a typical synthesis, 0.5 g of SEW-SBA-15-100 was mixed with 3 g of  $\text{CCl}_4$  and 1.35 g of EDA in a round bottom flask fitted with water cooled condenser. The mixture was refluxed at 90 °C for 6 hr under constant stirring. The temperature was increased in steps of 10 °C from 60 to 90 °C. After 6 hr, the unreacted  $\text{CCl}_4$  and EDA in the composite polymer were removed in rotavapor at 55 °C. The sample was then dried at 100 °C for 6 hr and then crushed into powder using a mortar and pestle. The crushed powder was then carbonized in a tubular furnace at 600 °C for 5h under nitrogen flow. The carbonized sample was then treated with 5% HF and the sample was washed

three times with excess ethanol and then kept for drying at 100 °C for 6 hr before characterization. The samples were labelled as SEW-MCN-1-T (where T = 100, 130 and 150 °C) and SEW abbreviated as above.

## 2. Characterization

The pore tuned silica templates, SEW-SBA-15-T, and the MCN materials, SEW-MCN-1-T (T= 100,130 and 150 °C), were characterized with low angle powder XRD. The Powder X-ray diffraction measurements were carried out on a *Bruker Advance D8-III* diffractometer using Bragg-Brentano geometry. The measurements were collected on using Cu K $\alpha$  radiation from a sealed tube source operating at 40 kV and 40 mA, a fixed divergence slit of 0.1 ° and a *Lynxeye* multi-pixel detector. The scan rate used was 0.01 °/sec. Nitrogen adsorption and desorption isotherms were measured at -196 °C on a Micromeritics ASAP 2420 surface area and porosity analyser. All the samples were degassed for 8 hr at 250 °C under a vacuum ( $p < 1 \times 10^{-5}$  pa) in the degas port of the adsorption analyser. The specific surface area was calculated using the standard BET model. Pore size distribution was obtained from the adsorption branches of the nitrogen isotherms using the BJH model.

The structural morphology of SEW-MCN-T samples was observed in JEOL FE-SEM 7001. The sample preparation for HR-SEM was involved sprinkling of a small quantity of powder sample on the carbon tab. The stub is kept in a vacuum oven at 70 °C for 7 hr before insertion into the SEM. The samples were coated with 5 nm layer of Iridium using Baltek coater using a nominal current of 15.5 mAp and coating time 60 sec. The HR-TEM images were taken using Tecnai F20 FEG TEM equipped with EDAX EDS and Gatan Image Filter (GIF). The preparation of the samples for HR-TEM imaging involved dissolution of a very small quantity about 10-15 mg of the sample in ethanol followed by sonication for 5-8 min. One drop from micro pipette is dropped on the holey carbon film supported on a copper grid and dried in open air before insertion in the TEM machine.

X-ray photoelectron spectroscopy was carried out using a Kratos Axis ULTRA X-ray Photoelectron Spectrometer incorporating a 165 mm hemispherical electron energy analyser.

Survey and multiregion spectra were recorded at C<sub>1s</sub> and N<sub>1s</sub> photoelectron peaks. Each spectra region of photoelectron of interest was scanned several times to obtain good signal to noise ratios. The spectrometer used had the following operating configuration. The incident radiation was Monochromatic Al K $\alpha$  X-rays (1486.6 eV) at 225 W (15 kV, 15 ma). Survey (wide) scans were taken at analyser pass energy of 160 eV and multiplex (narrow) high resolution scans at 20 eV. Survey scans were carried out over 1200-0 eV binding energy range with 1.0 eV steps and a dwell time of 100 ms. Narrow high-resolution scans were run with 0.05 eV steps and 250 ms dwell time. Base pressure in the analysis chamber was 1.0x10<sup>-9</sup> torr and during sample analysis 1.0x10<sup>-8</sup> torr. Atomic concentrations were calculated using the CasaXPS version 2.3.14 software and a Shirley baseline with Kratos library Relative Sensitivity Factors (RSFs). Peak fitting of the high-resolution data was also carried out using the CasaXPS software.

High pressure CO<sub>2</sub> adsorption was carried out on Quanta chrome Isorb HP1 equipped with temperature controlled circulator. The CO<sub>2</sub> adsorption was carried out at 30 bar and different analysis temperatures of 0, 10 and 25 °C were used. Prior to CO<sub>2</sub> adsorption, samples were degassed for 10 hr at 250 °C. The isosteric heat of adsorption was calculated using Clausius-Clapeyron equation.

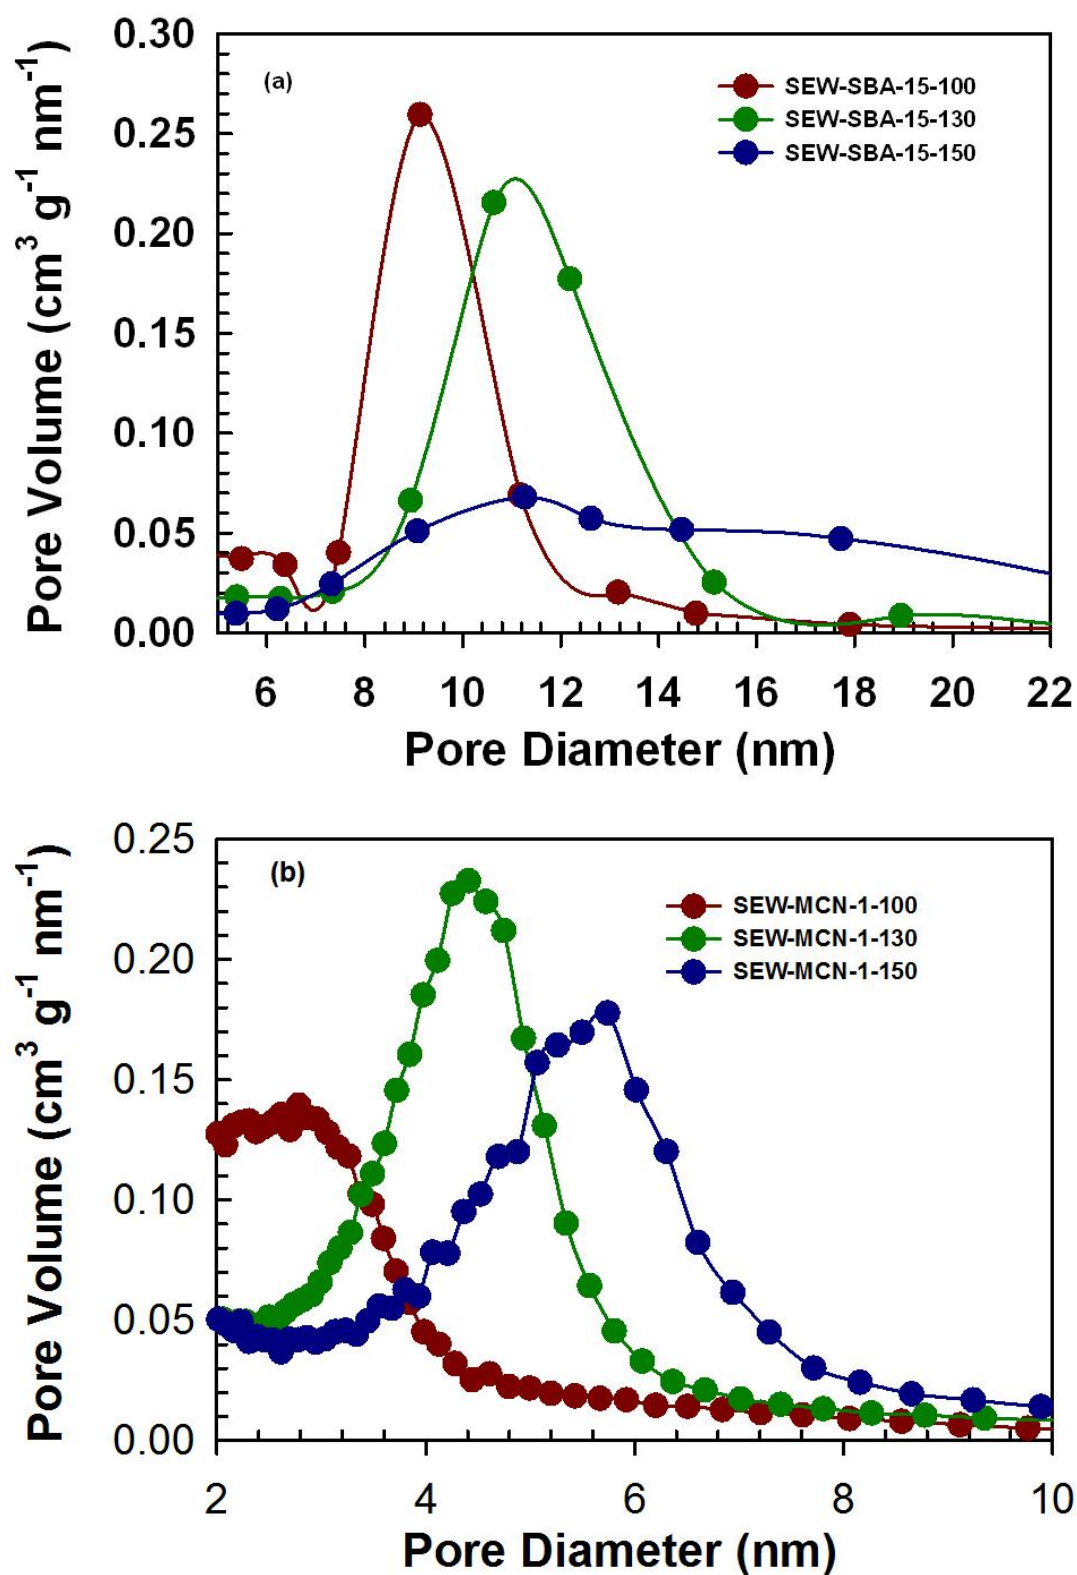

**Figure 15.** Pore size distribution plot obtained from the adsorption branch of nitrogen adsorption isotherm: (a) SEW-SBA-15-T and (b) SEW-MCN-1-T.

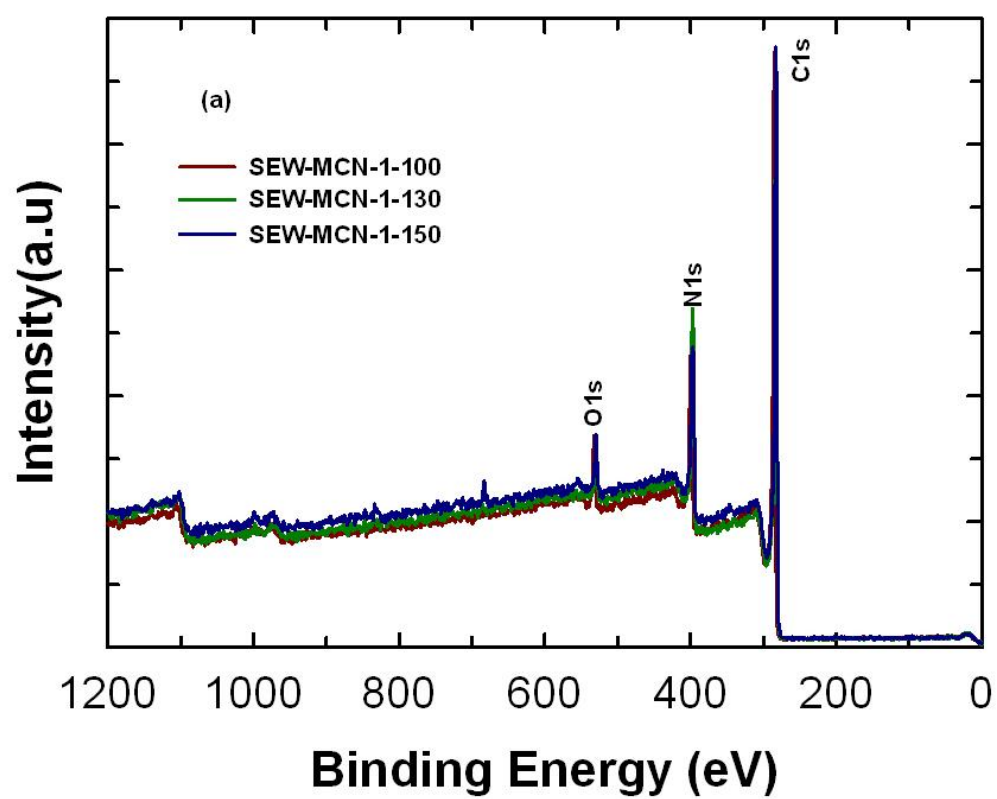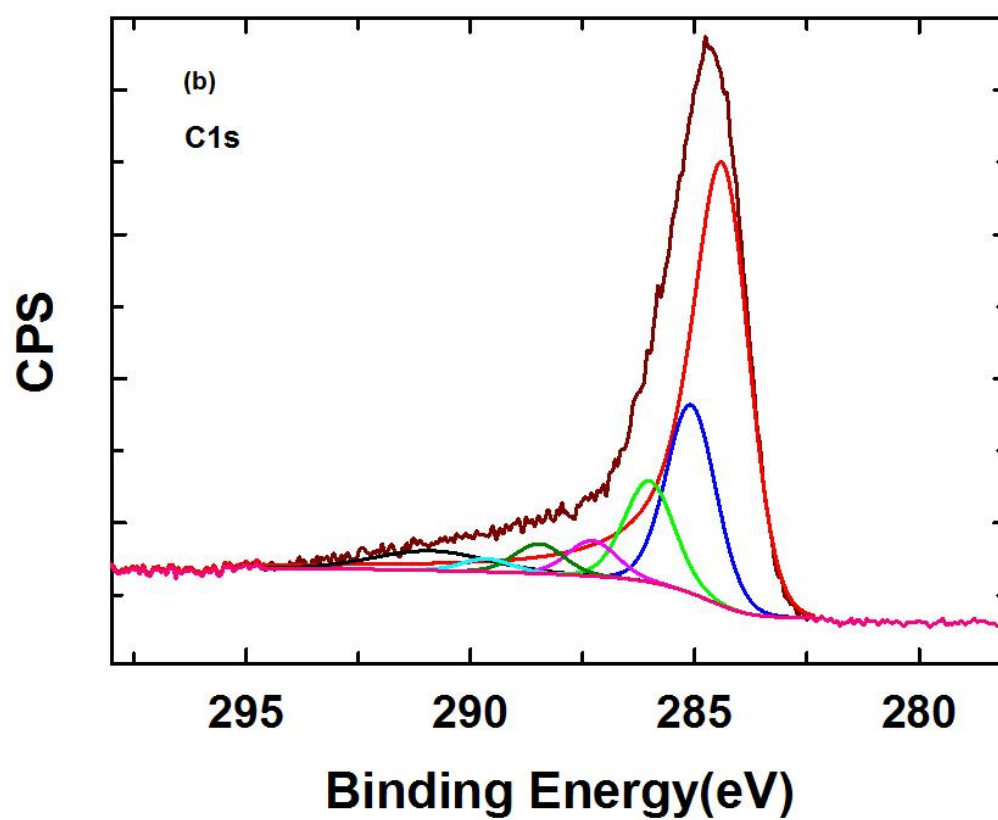

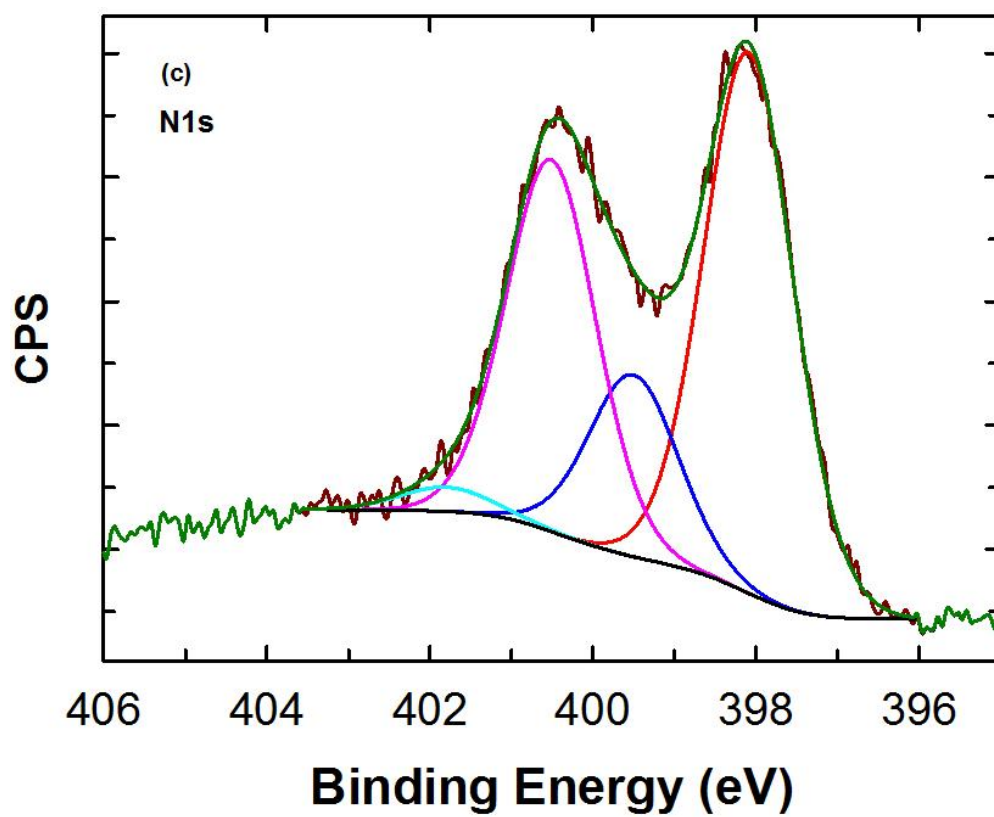

**Figure 2S.** (a) Survey spectra of SEW-MCN-1-T samples, (b) high resolution C1s spectrum of SEW-MCN-1-130 sample, and (c) high resolution N1s spectrum of SEW-MCN-1-130 sample.

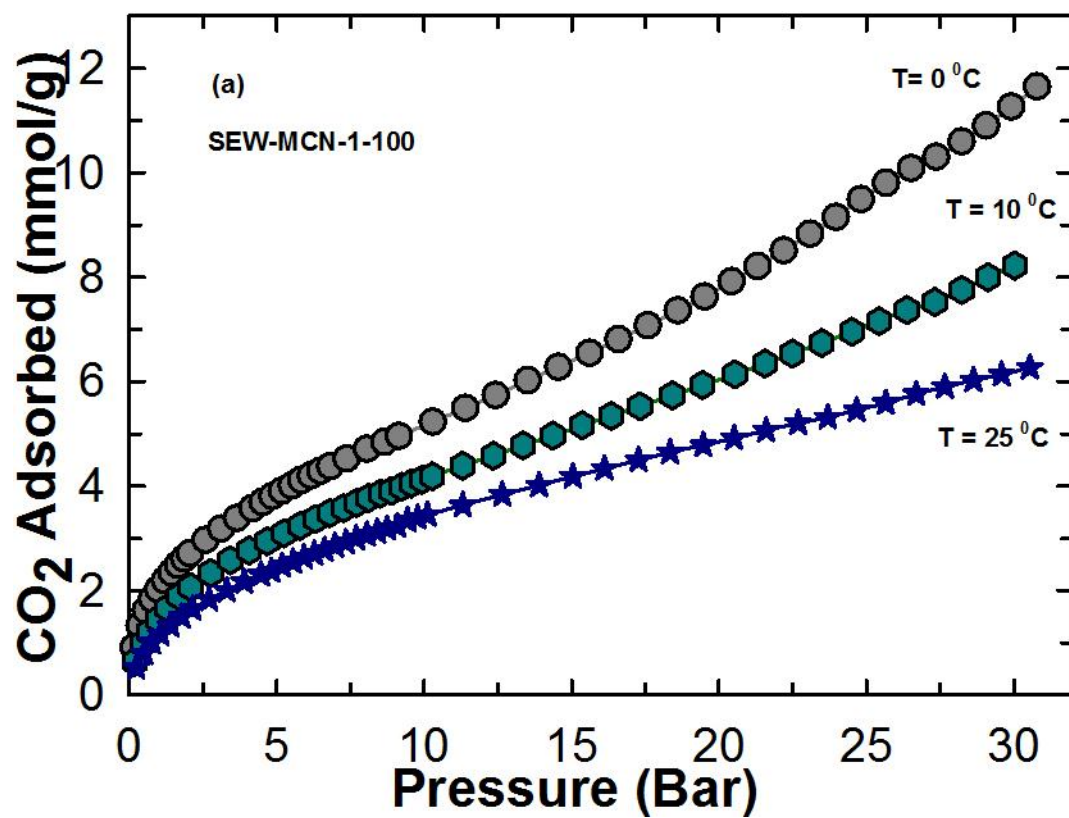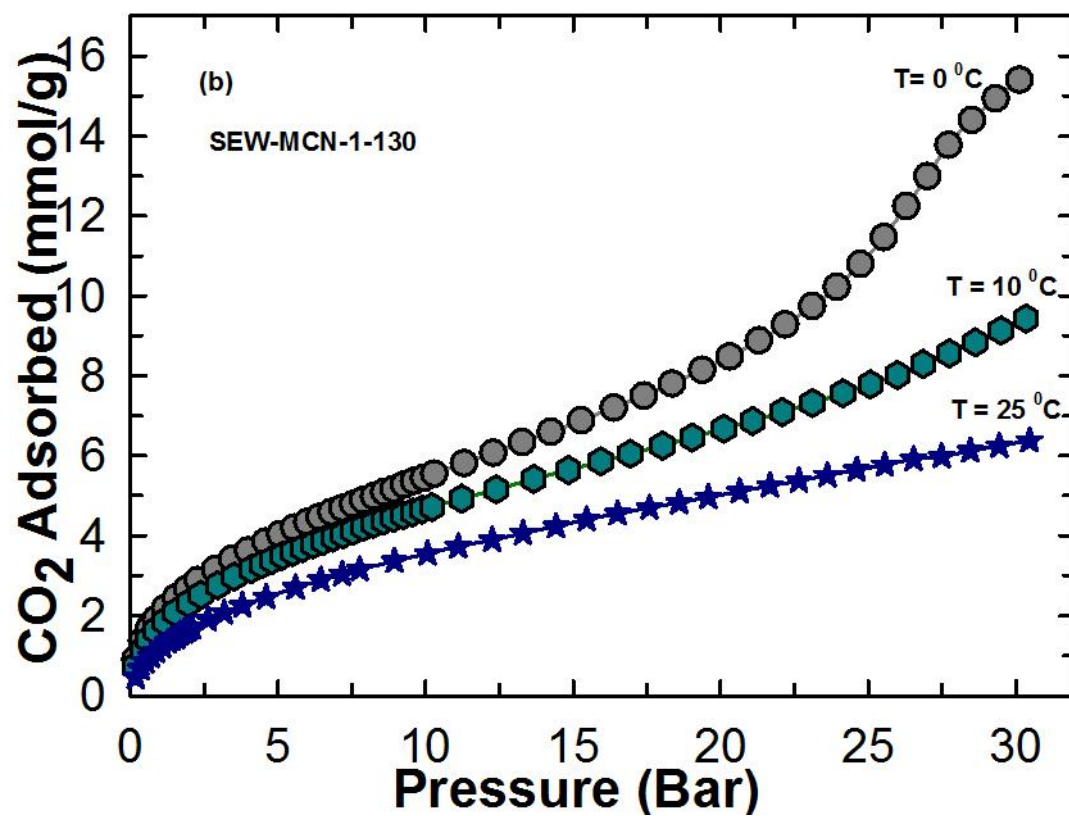

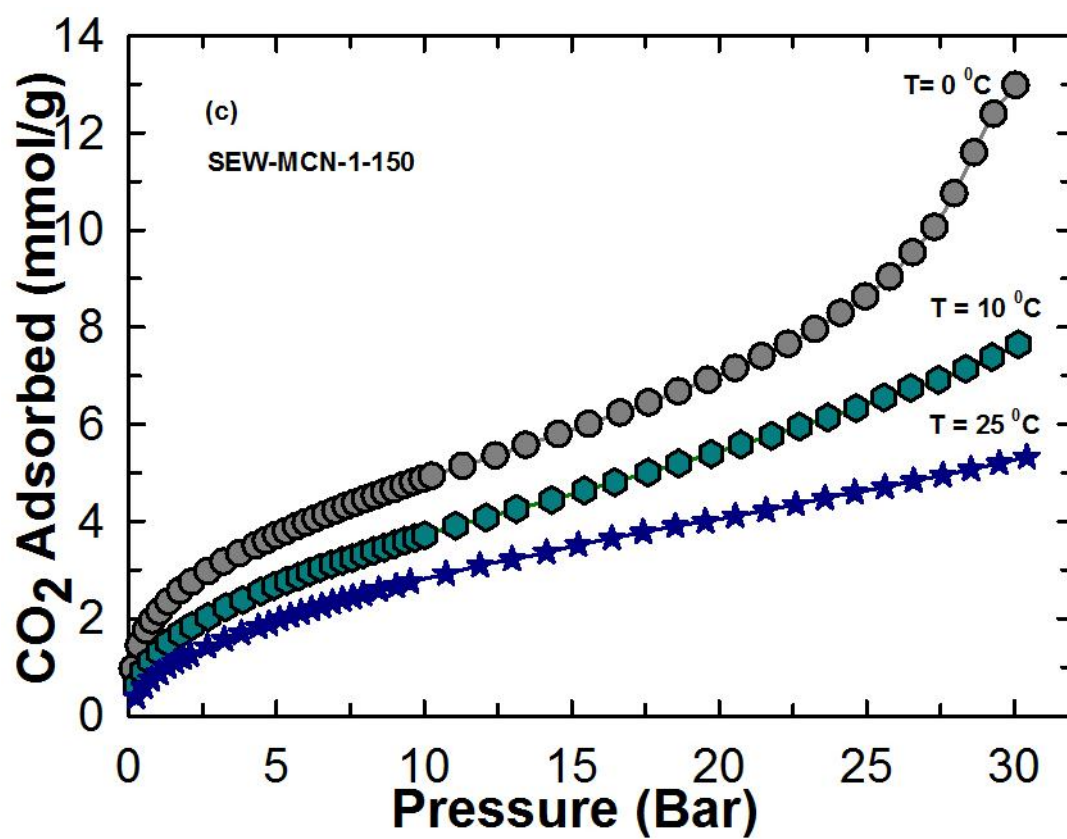

**Figure 35.** CO<sub>2</sub> adsorption isotherms of (a) SEW-MCN-1-100, (b) SEW-MCN-1-130, and (c) SEW-MCN-1-150.

| Sample         | $a_0$<br>(nm) | PD<br>(nm) | $t^* (a_0 - P_D)$<br>(nm) |
|----------------|---------------|------------|---------------------------|
| SBA-15-100C    | 10.63         | 8.4        | 2.23                      |
| SBA-15-130C    | 11.32         | 11.25      | 0.07                      |
| SBA-15-150C    | 11.74         | 11.29      | 0.45                      |
| SEW-SBA-15-100 | 12            | 9.12       | 2.88                      |
| SEW-SBA-15-130 | 11.7          | 10.5       | 1.2                       |
| SEW-SBA-15-150 | 11.5          | 11.2       | 0.3                       |
| MCN-1-100C     | 10.38         | 3.76       | 6.62                      |
| MCN-1-130C     | 11.16         | 4.99       | 6.17                      |
| MCN-1-150C     | 11.32         | 5.94       | 5.38                      |
| SEW-MCN-1-100  | 10.9          | 2.8        | 8.1                       |
| SEW-MCN-1-130  | 10.6          | 4.4        | 6.2                       |
| SEW-MCN-1-150  | 11.8          | 5.7        | 6.1                       |

**SI Table 1S.** Comparison of the wall thickness of different materials

\* $t$  is the calculated wall thickness for a hexagonal p6mm symmetry.

**SI Table 2S.** Atomic compositions of SEW-MCN-1-T samples from XPS and CNS analysis.

| Sample        | XPS (surface atomic composition) |       |      | CNS (bulk composition) |      |
|---------------|----------------------------------|-------|------|------------------------|------|
|               | C (%)                            | N(%)  | O(%) | C                      | N    |
| SEW-MCN-1-100 | 79                               | 17.12 | 3.89 | 61.7                   | 18.6 |
| SEW-MCN-1-130 | 79.32                            | 17.74 | 2.94 | 64.6                   | 17.7 |
| SEW-MCN-1-150 | 76.87                            | 20.45 | 2.68 | 62.8                   | 21.4 |

**SI Table 3S.** CO<sub>2</sub> adsorption capacities of SEW-MCN-1-T samples at different temperatures and 30 bar pressure.

| Sample        | CO <sub>2</sub> adsorption capacity(mmol/g) |       |       |
|---------------|---------------------------------------------|-------|-------|
|               | 0 °C                                        | 10 °C | 25 °C |
| SEW-MCN-1-100 | 11.6                                        | 8.2   | 6.2   |
| SEW-MCN-1-130 | 15.4                                        | 9.4   | 6.4   |
| SEW-MCN-1-150 | 13                                          | 7.6   | 5.3   |

**SI Table 4S.** Isotheric heat of adsorption of SEW-MCN-1-T samples and its comparison with other materials.

| Sample        | Isotheric heat of adsorption <sup>a</sup><br>(kJ/mol) |
|---------------|-------------------------------------------------------|
| SEW-MCN-1-100 | 38.61 – 19.96                                         |
| SEW-MCN-1-130 | 34.44 – 22.21                                         |
| SEW-MCN-1-150 | 60.99 – 24.40                                         |
| MCN-1-100s    | 31.1 – 22.0 <sup>[14]</sup>                           |
| MCN-1-130s    | 27.9 – 16.3 <sup>[13]</sup>                           |
| MCN-1-150s    | 54.9 – 22.3 <sup>[13]</sup>                           |
| MCN-7-130     | 34.9 – 24.0 <sup>[3]</sup>                            |

**SI Table 5S.** Area normalized CO<sub>2</sub> adsorption capacity of SEW-MCN-1-T samples.

| Sample Code   | BET S.A<br>(m <sup>2</sup> /g) | CO <sub>2</sub> Adsorption<br>(mmol/g) at 273K | % N content | CO <sub>2</sub> Adsorption/ BET S.A<br>(umol/m <sup>2</sup> ) |
|---------------|--------------------------------|------------------------------------------------|-------------|---------------------------------------------------------------|
| SEW-MCN-1-100 | 557                            | 11.6                                           | 17.12       | 20.8                                                          |
| SEW-MCN-1-130 | 655                            | 15.4                                           | 17.74       | 23.5                                                          |
| SEW-MCN-1-150 | 638                            | 13.0                                           | 20.45       | 20.3                                                          |
